# Supplementary material for: Fixed-to-Mobile Substitution, Complementarity and Convergence
Source: MDPI journal article supplement (doi:10.3390/gels10050318), 2006-01-01
Supplement: s1 [file s1]

## Supporting Information

### Gelatin-based hydrogel functionalized with dopamine and LDH for wound healing

Weijie Zhang<sup>1,2</sup>, Bing Zhang<sup>1,\*</sup>, Yihu Wang<sup>1</sup>, Xiaofeng Cao<sup>1</sup>, Jianing Wang<sup>1</sup>, Weipeng Lu<sup>1</sup>, and Yanchuan Guo<sup>1,2,\*</sup>

<sup>1</sup> Key Laboratory of Photochemical Conversion and Optoelectronic Materials, Technical Institute of Physics and Chemistry, Chinese Academy of Sciences, Beijing 100190, China

<sup>2</sup> School of Chemical Sciences, University of Chinese Academy of Sciences, Beijing 100049, China

\* Corresponding author: zhangbing@mail.ipc.ac.cn; yanchuanguo@mail.ipc.ac.cn

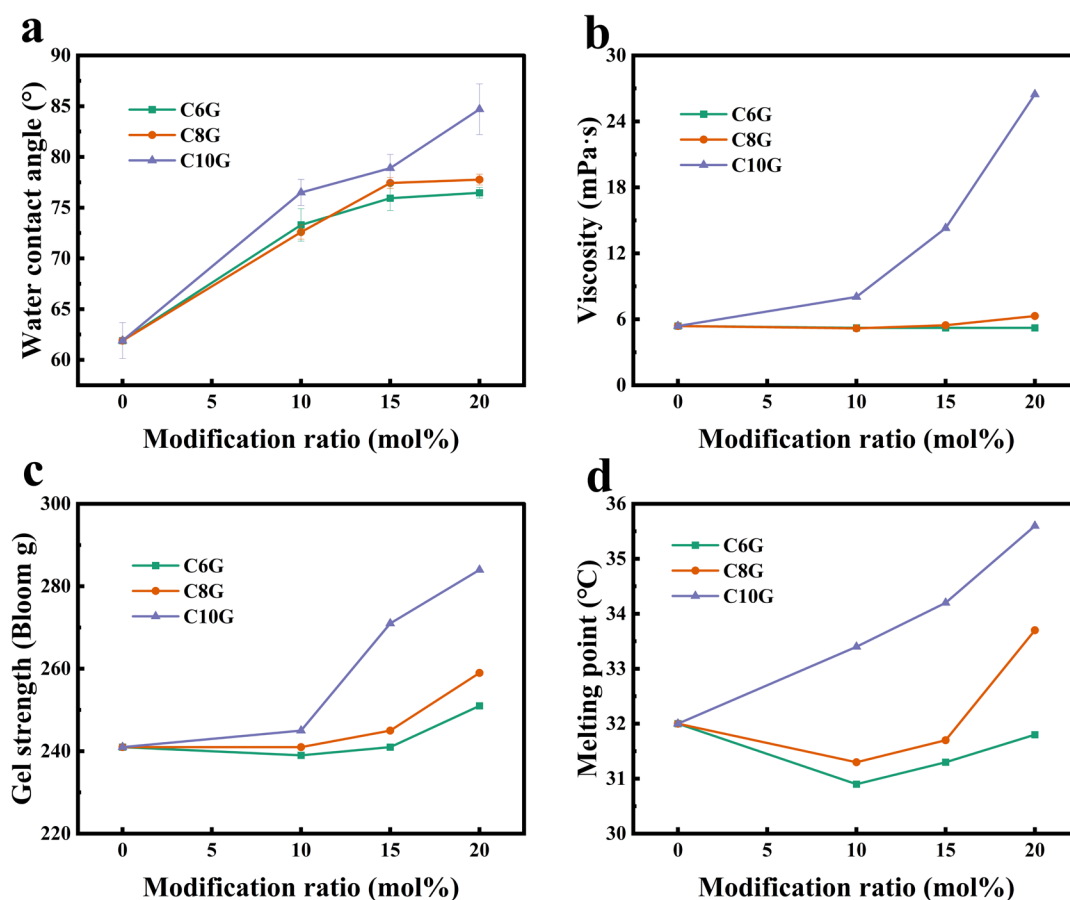

**Figure S1.** (a) Water contact angle, (b) viscosity, (c) gel strength, and (d) melting point of hydrophobically modified gelatin

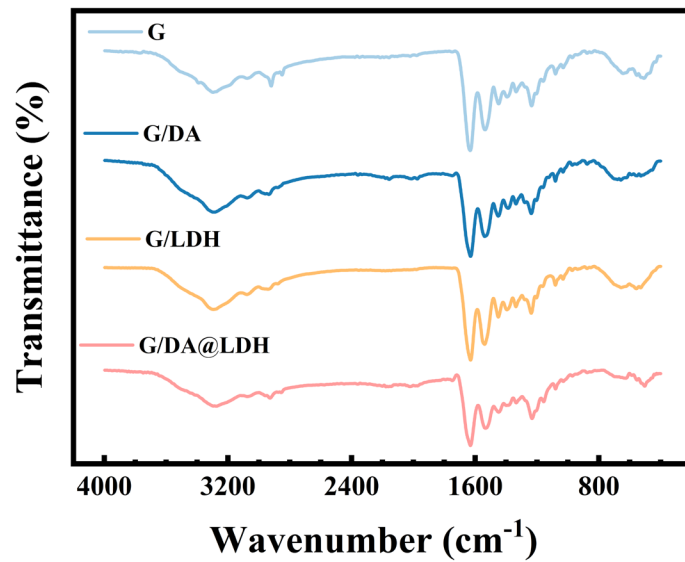

**Figure S2.** FT-IR spectra of hydrogels
